# Supplementary material for: Blood transcriptomic diagnosis of pulmonary and extrapulmonary tuberculosis
Source: JCI journal article supplement (doi:10.1172/jci.insight.87238), 2016-10-05
Supplement: sd2 [file 2]

You are being redirected.
